# Supplementary material
Source: PubMed Central journal article supplement (PMC2826211)

## Supplemental Figure Legends

**Supplemental Figure S1.** Neuroligin-1 clusters glutamate and GABA synaptic vesicles. **(A, B)** Fibroblasts expressing HA-neuroligin-1 co-cultured with hippocampal neurons induced clusters of VGlut1 **(A)** and GAD **(B)** in contacting glutamatergic and GABAergic axons. The induced clusters of VGlut1 **(A)** lacked postsynaptic PSD-95 immunoreactivity (arrowhead) in contrast to endogenous synaptic clusters (arrow). The induced clusters of GAD **(B)** lacked postsynaptic gephyrin immunoreactivity (arrowhead), in contrast to endogenous synaptic clusters (arrow). **(C, D)** Fibroblasts expressing YFP co-cultured with hippocampal neurons had no effect on VGlut1 **(C)** or GAD **(D)** in contacting axons. Only endogenous clusters of VGlut1 associated with postsynaptic PSD-95 immunoreactivity **(C)**, and endogenous clusters of GAD associated with postsynaptic gephyrin immunoreactivity **(D)** (arrows) were observed. Scale bar 10  $\mu$ m.

**Supplemental Figure S2.** Recombinant CFP-neurexin-1 $\beta$  localizes to glutamate and GABA presynaptic terminals. **(A)** GABAergic neurons expressing CFP-neurexin-1 $\beta$  co-clustered the neurexin with co-expressed synaptophysin-YFP and endogenous GAD at GABAergic terminals. The synaptophysin-YFP was co-expressed to mark transfected neuron terminals; two GABAergic axons are seen in the field of view, only one of which was transfected. A similar clustered distribution of CFP-neurexin was observed when it was expressed alone. **(B)** Glutamatergic neurons expressing CFP-neurexin-1 $\beta$  co-clustered the neurexin with co-expressed synaptophysin-YFP and endogenous VGlut1 at glutamatergic terminals. Some untransfected VGlut1-positive terminals are also seen in the field of view. Scale bar 10  $\mu$ m.

**Supplemental Figure S3.** N-cadherin and NgCAM do not induce postsynaptic protein clustering. Coculture of fibroblasts expressing N-cadherin-YFP **(A, B)** or NgCAM-YFP **(C, D)** with hippocampal neurons did not induce clustering of gephyrin or PSD-95 at dendrite contacts with expressing fibroblasts. Only endogenous synaptic clusters of gephyrin and PSD-95

colocalized with synapsin were observed. This is in contrast to the ability of neurexin-CFP to induce clustering of gephyrin and PSD-95 as shown in Figure 1. Scale bar 10  $\mu$ m.

**Supplemental Figure S4.** Neurexin induces postsynaptic protein clustering in immature or mature neurons. **(A, B)** Fibroblasts expressing neurexin-1 $\beta$ -CFP were cocultured with hippocampal neurons at only 2-3 days in culture, before neurons form endogenous synapses. Even in these very young neurons, small but distinct non-synaptic clusters of gephyrin and PSD-95 were consistently observed in association with fibroblasts expressing neurexin-CFP, often following the edges or filopodia of the expressing fibroblasts. Insets show enlarged regions containing neurexin-induced gephyrin and PSD-95 clusters. **(C)** Fibroblasts expressing neurexin-1 $\beta$ -CFP also induced non-synaptic clusters of gephyrin and PSD-95 in mature 14-16 day cultured neurons, at neighboring but largely distinct sites in contacting dendrites. These results for hippocampal neurons at different ages are similar to the results at 1 week in culture shown in Figure 1. Scale bar 10  $\mu$ m.

**Supplemental Figure S5.** Neurexin clusters multiple glutamatergic postsynaptic scaffolding and signaling proteins. **(A, C)** Fibroblasts expressing neurexin-1 $\beta$ -CFP co-cultured with hippocampal neurons induced clusters of the excitatory scaffolding protein GKAP/SAPAP **(A)** and excitatory signaling protein SynGAP **(C)** in contacting dendrites. Induced clusters (arrowhead) lacked immunoreactivity for VGlut1, unlike endogenous synaptic clusters (arrow). Induced clusters were often associated with the edges of transfected fibroblasts. **(B, D)** Fibroblasts expressing mCFP co-cultured with hippocampal neurons did not affect the distribution of GKAP **(B)** or SynGAP **(D)** in contacting dendrites. Only endogenous clusters associated with VGlut1-positive terminals (arrow) were observed. Scale bar 10  $\mu$ m.

**Supplemental Figure S6.** Neurexin but not mCFP clusters GABA and NMDA glutamate receptors. **(A, B)** Fibroblasts expressing mCFP co-cultured with hippocampal neurons did not

affect the distribution of GABA<sub>A</sub>R $\gamma$ 2 (**A**) or NR1 (**B**), the essential subunit of NMDA receptors, in contacting dendrites. Only endogenous clusters associated with synapsin-positive terminals (arrow) were observed. This is in contrast to the ability of neurexin-CFP to induce clusters of GABA<sub>A</sub>R $\gamma$ 2 and NR1 in a similar assay (Figure 3A, B). (**C**) Fibroblasts expressing mCFP co-cultured with hippocampal neurons did not affect the distribution of GluR1 AMPA receptor subunit in contacting dendrites. Only endogenous clusters associated with synapsin-positive terminals (arrow) were observed. Scale bar 10  $\mu$ m.

**Supplemental Figure S7.** Neurexin-induced receptor clusters are on the dendrite surface. (**A**, **B**) Apparent induced clusters (arrowhead) of GABA<sub>A</sub>R $\gamma$ 2 (**A**) and NR1 (**B**) associated with the edges of fibroblasts expressing neurexin-1 $\beta$ -CFP were present on neuronal dendrites identified as MAP2-immunoreactive. (**C**) Neurexin-1 $\beta$ -CFP did not induce clustering of GluR1 in contacting MAP2-immunoreactive dendrites; only apparent endogenous clusters were observed (arrow). (**D**, **E**) Live cell incubation with an antibody against an extracellular epitope of the GABA receptor showed that the nonsynaptic receptor clusters induced by contact with fibroblasts expressing neurexin-1 $\beta$ -CFP are on the cell surface. This example also illustrates that concentrations of neurexin-CFP are sometimes seen in the contacting fibroblasts at concentrations of induced receptors and scaffolding proteins (**E**). Scale bars A-C 10  $\mu$ m; D 20  $\mu$ m; E 5  $\mu$ m.

**Supplemental Figure S8.** The agrin LNS domain cannot functionally substitute for the neurexin LNS. (**A-C**) Fibroblasts expressing either full-length agrin (**A**, **B**) or the neurexin construct with the agrin LNS swap (**C**) co-cultured with hippocampal neurons did not affect the distribution of PSD-95 or gephyrin in contacting dendrites. Only endogenous synaptic clusters of PSD-95 and gephyrin colocalizing with synapsin were observed (arrows). (**D-I**) Inactive neurexin deletion constructs and agrin LNS swap reach the surface of transfected HEK cells as indicated by confocal optical sections. (**D**) Control CFP filled the HEK cells. (**E**) mCFP appeared associated

with the HEK cell plasma membrane. **(F)** Full length neurexin-1 $\beta$ -CFP appeared on the surface of HEK cells, indicated by association with the periphery and labeling of filopodia. **(G)** The neurexin-1 $\beta$ -CFP glycosylation domain deletion showed some intracellular pools but appeared largely cell surface. **(H)** The neurexin-1 $\beta$ -CFP LNS domain deletion showed some intracellular pools but appeared largely cell surface. **(I)** The neurexin construct with the agrin LNS swap also appeared to reach the cell surface efficiently, indicated by association with the periphery and labeling of filopodia. Scale bars 10  $\mu$ m.

**Supplemental Figure S9.** Neurexin but not mCFP clusters neuroligins. **(A, B)** Fibroblasts expressing neurexin-1 $\beta$ -CFP co-cultured with hippocampal neurons did not affect the distribution of  $\alpha$ -dystroglycan **(A)** or  $\beta$ -dystroglycan **(B)** in contacting dendrites. Clusters of  $\alpha$ -dystroglycan were relatively uniformly distributed along MAP2-positive processes, with no particular association with neurexin contact sites **(A)**, and only endogenous clusters of  $\beta$ -dystroglycan associated with synapsin-positive terminals (arrow) were observed **(B)**. **(C, D)** Fibroblasts expressing mCFP co-cultured with hippocampal neurons did not affect the distribution of YFP-neuroligin-1 **(C)** or YFP-neuroligin-2 **(D)** in contacting dendrites of transfected neurons. Only YFP-neuroligin-1 and YFP-neuroligin-2 clusters associated with synapsin-positive terminals (arrow) were observed. This is in contrast to the ability of neurexin-CFP to induce non-synaptic clusters of YFP-neuroligin-1 and -2 in a similar assay (Figure 3B, C). **(E)** Fibroblasts expressing neurexin-1 $\beta$ -CFP co-cultured with hippocampal neurons induced clusters of endogenous neuroligin-2 in contacting dendrites. Induced clusters (arrowhead) lacked immunoreactivity for GAD or VGlut, in contrast to endogenous synaptic clusters (arrow). **(F)** Fibroblasts expressing mCFP co-cultured with hippocampal neurons did not affect the distribution of endogenous neuroligin-2 in contacting dendrites. Only neuroligin-2 clusters associated with GAD-positive terminals (arrow) were observed. Scale bar 10  $\mu$ m.

**Supplemental Figure S10.** Model for the role of neurexins and neuroligins in glutamate and GABA synapse assembly. Lines indicate reported protein-protein interactions; dashed lines indicate proposed, most likely indirect, interactions. The model is based on the results presented here and previously reported protein localization and interaction data.

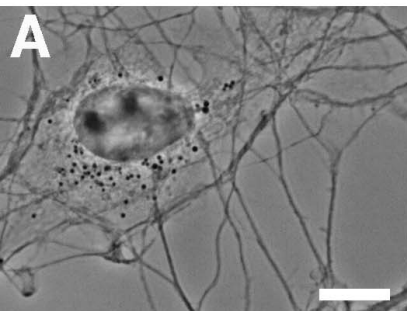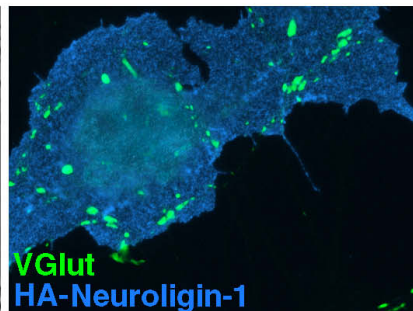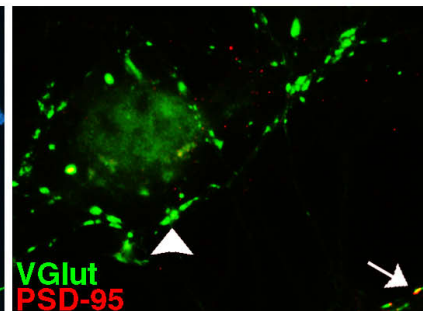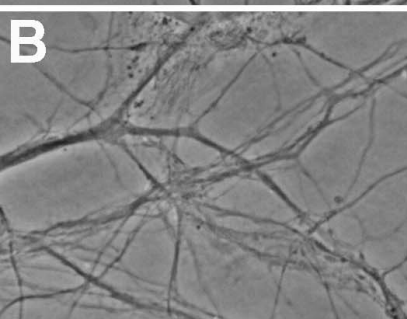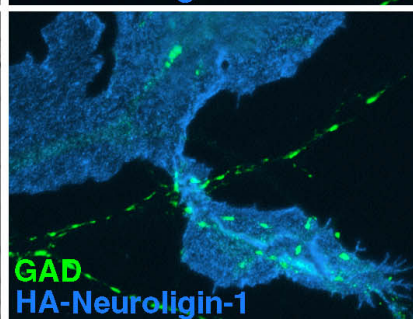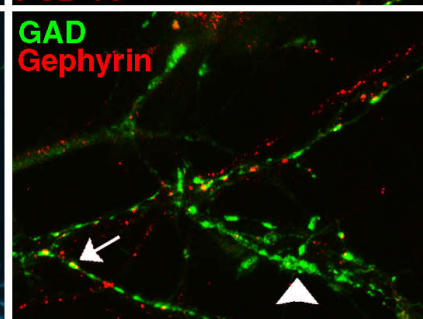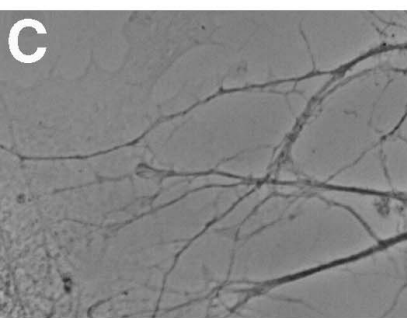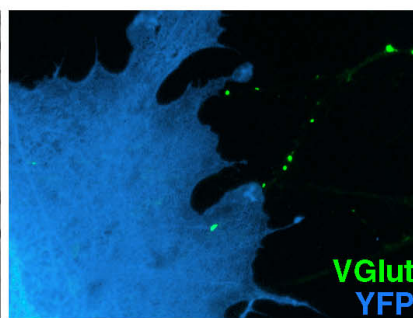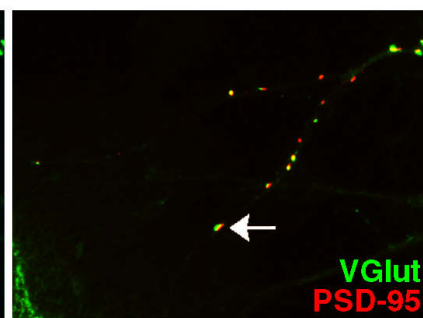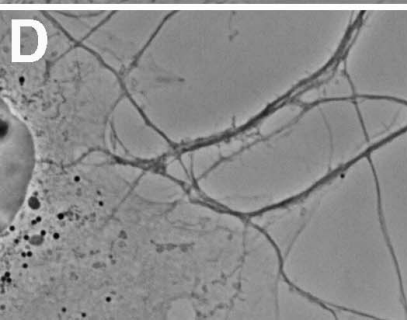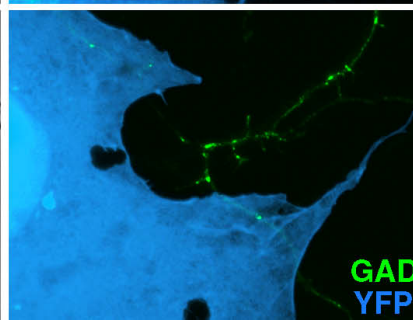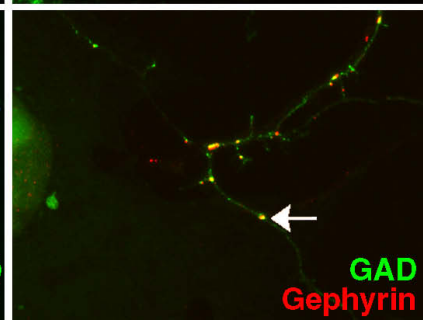

**A**

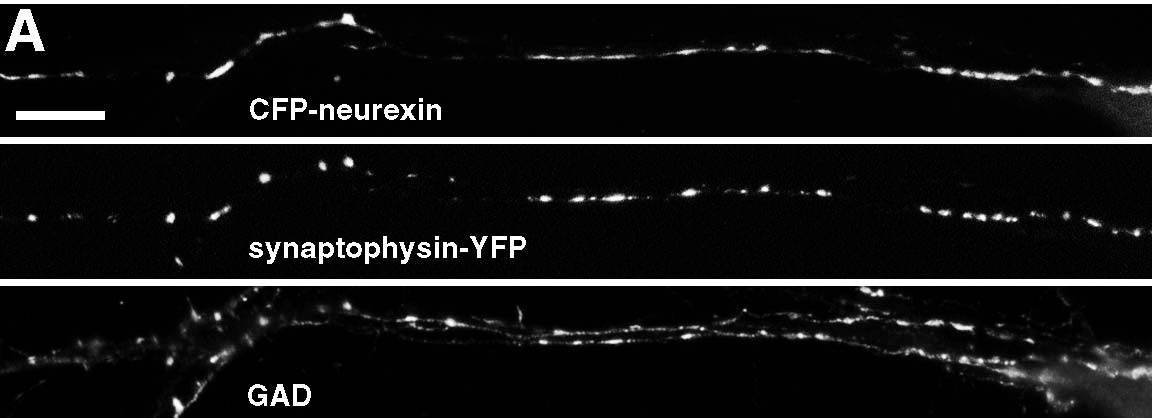

**B**

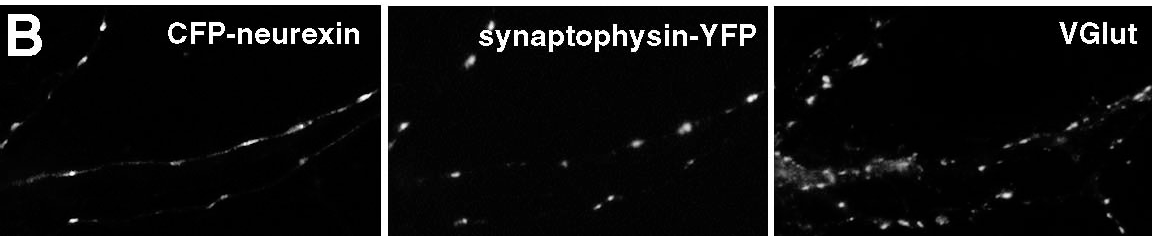

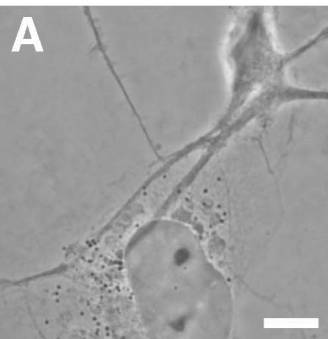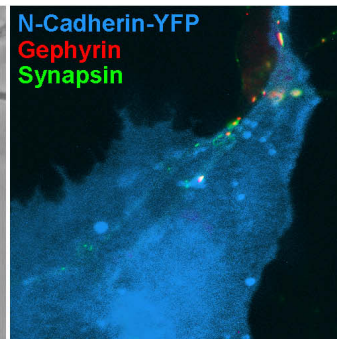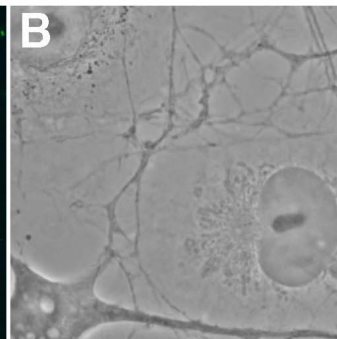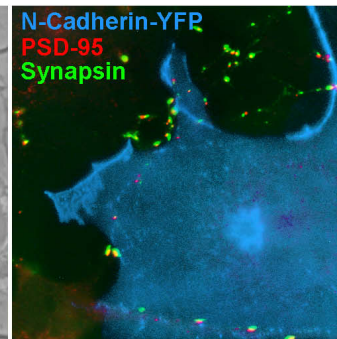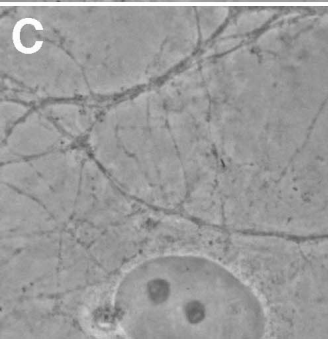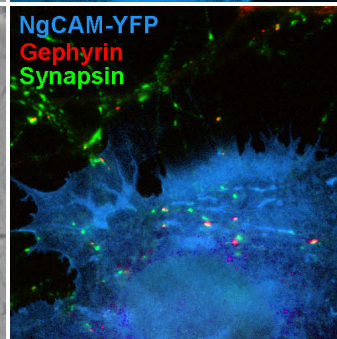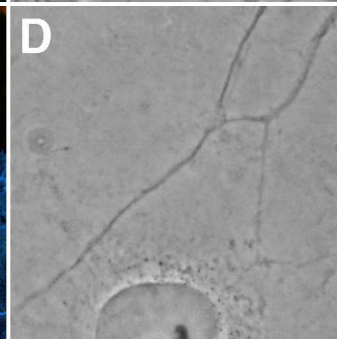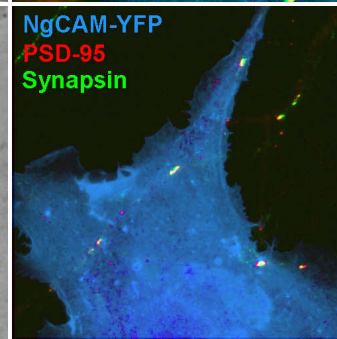

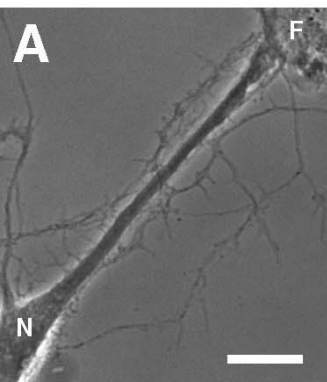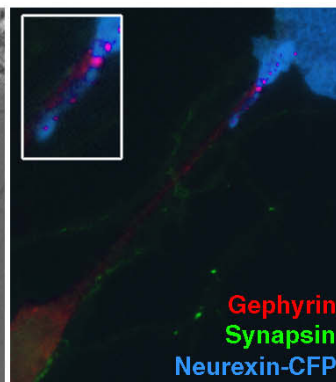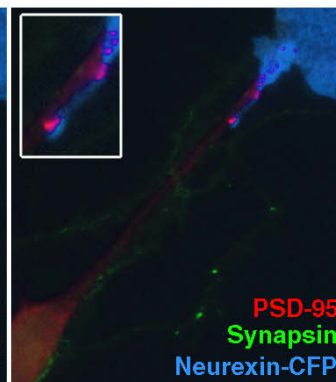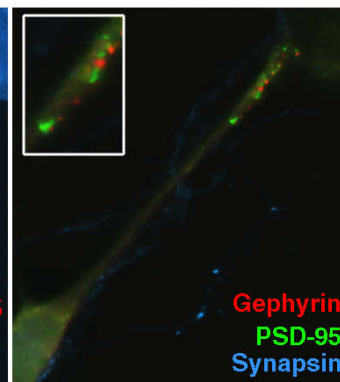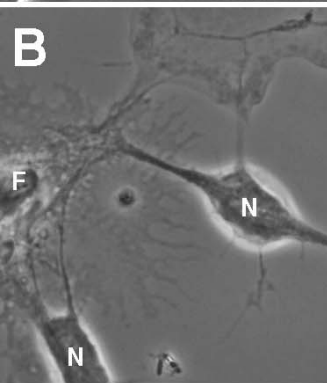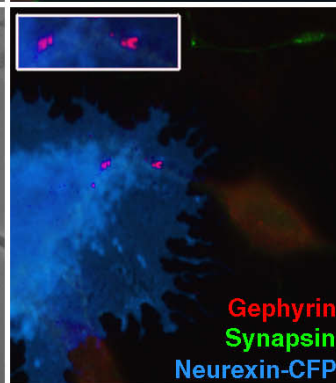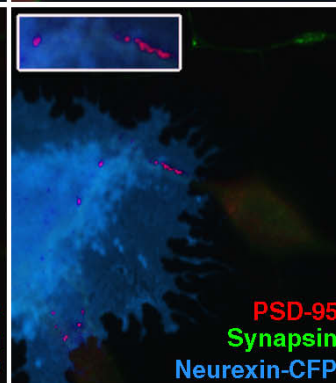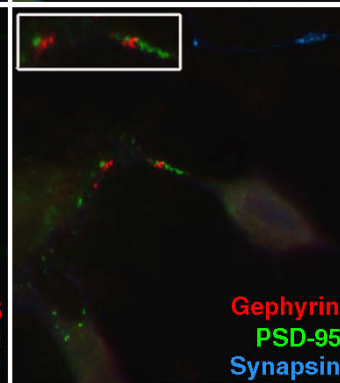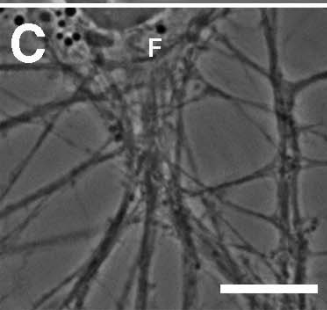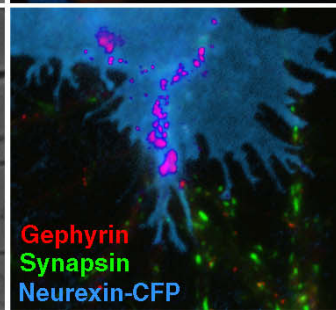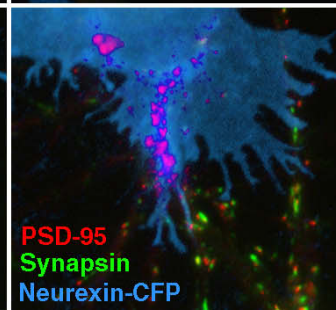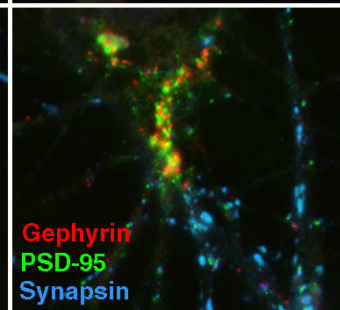

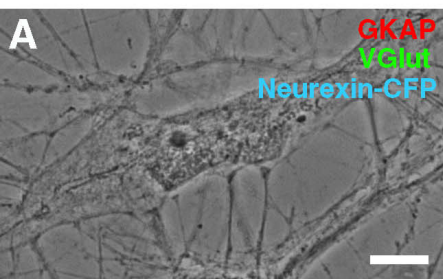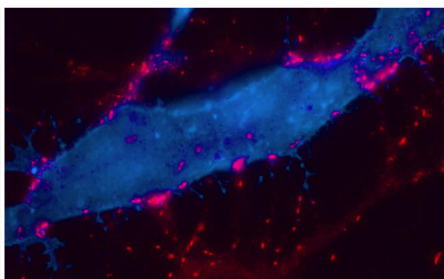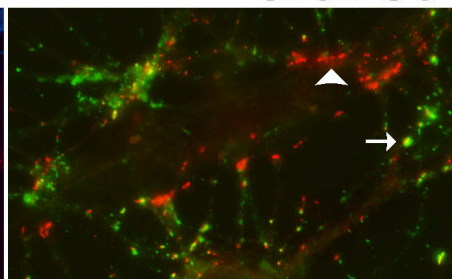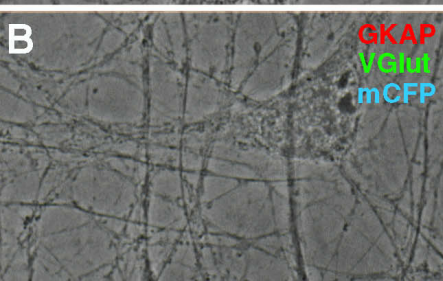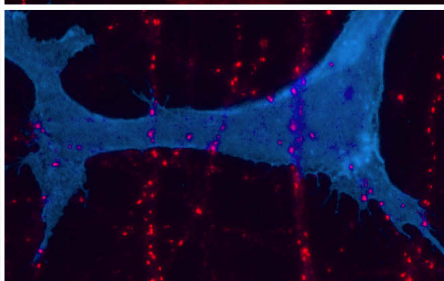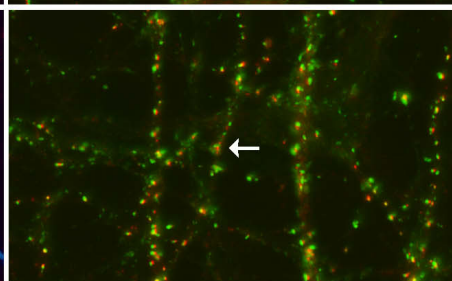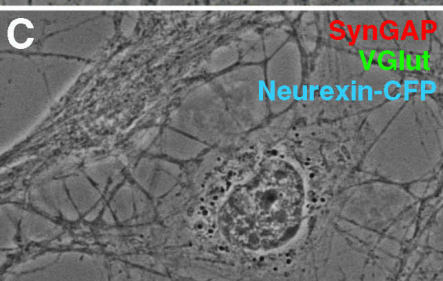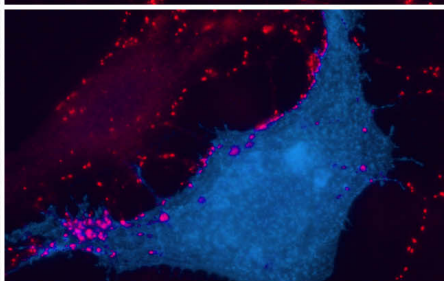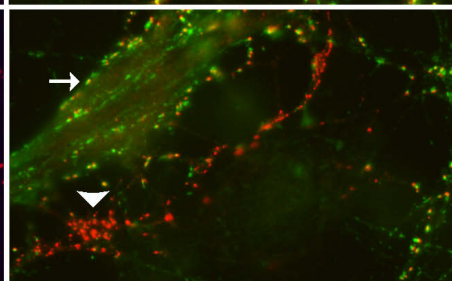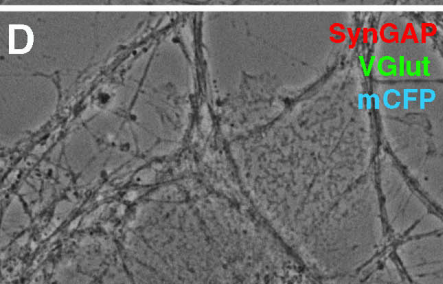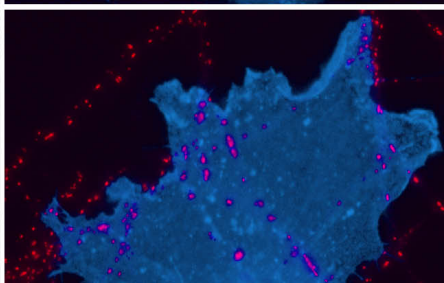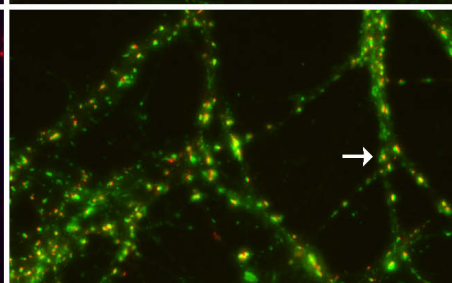

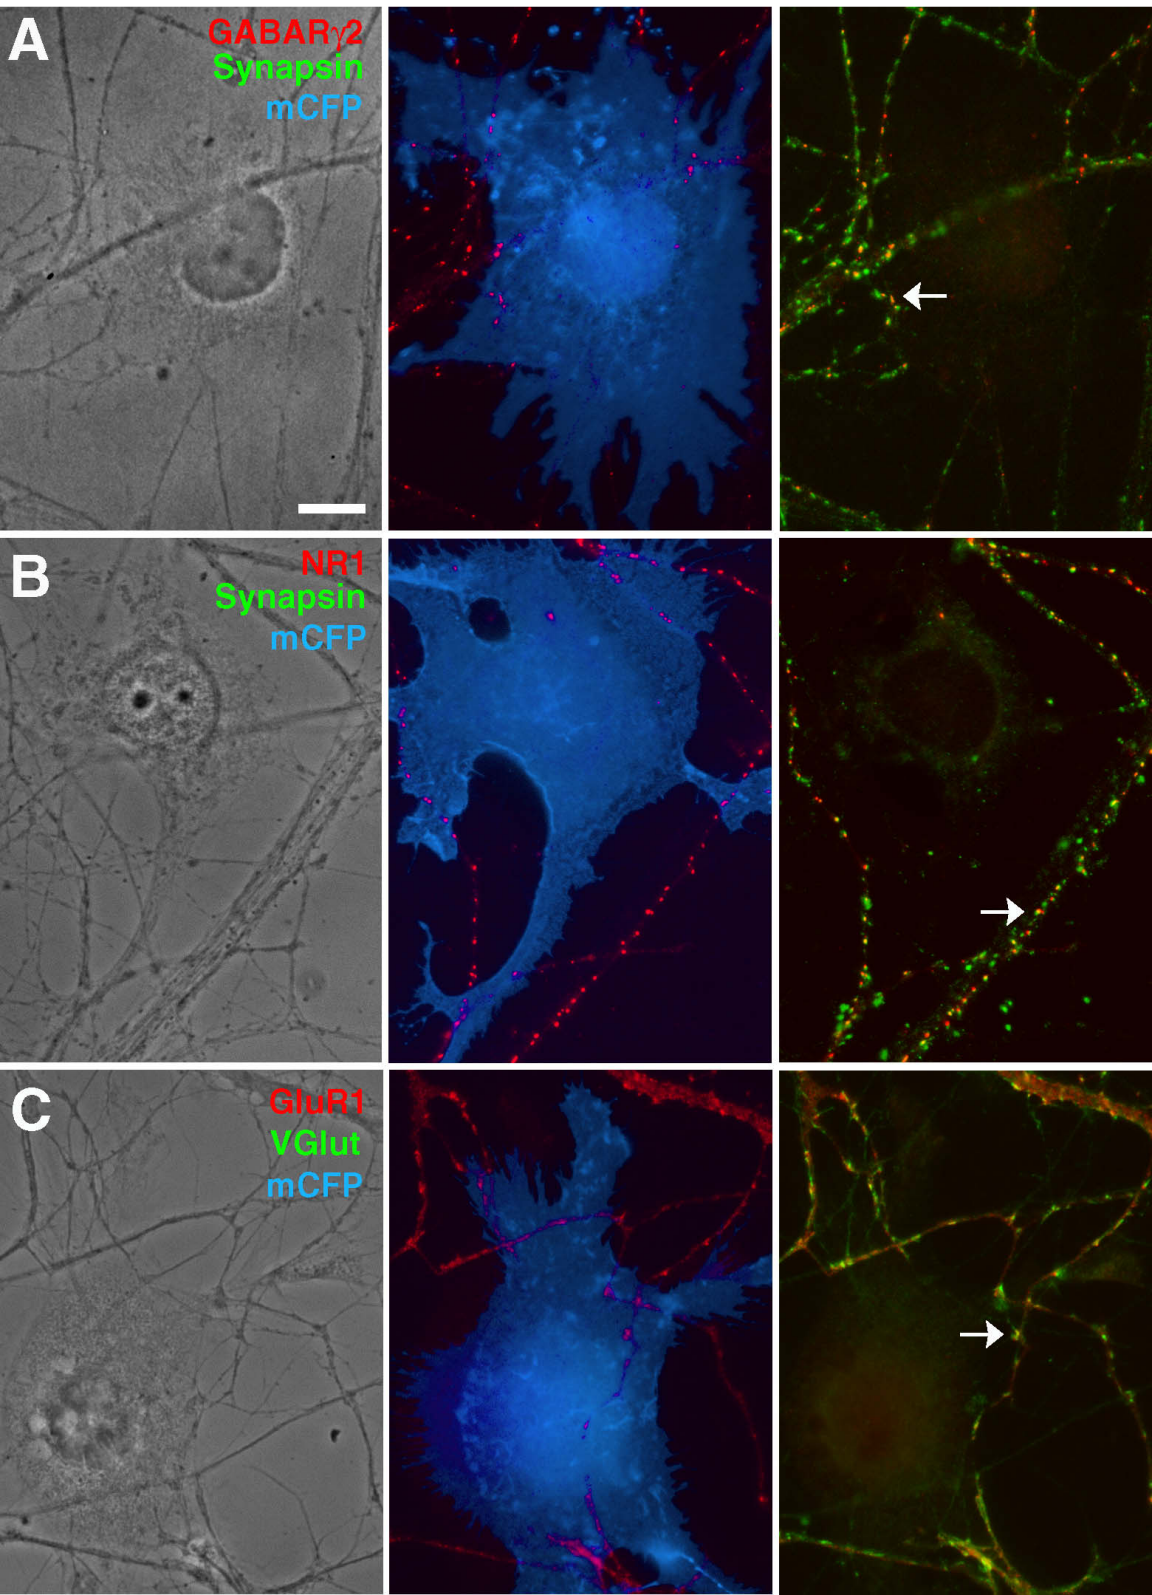

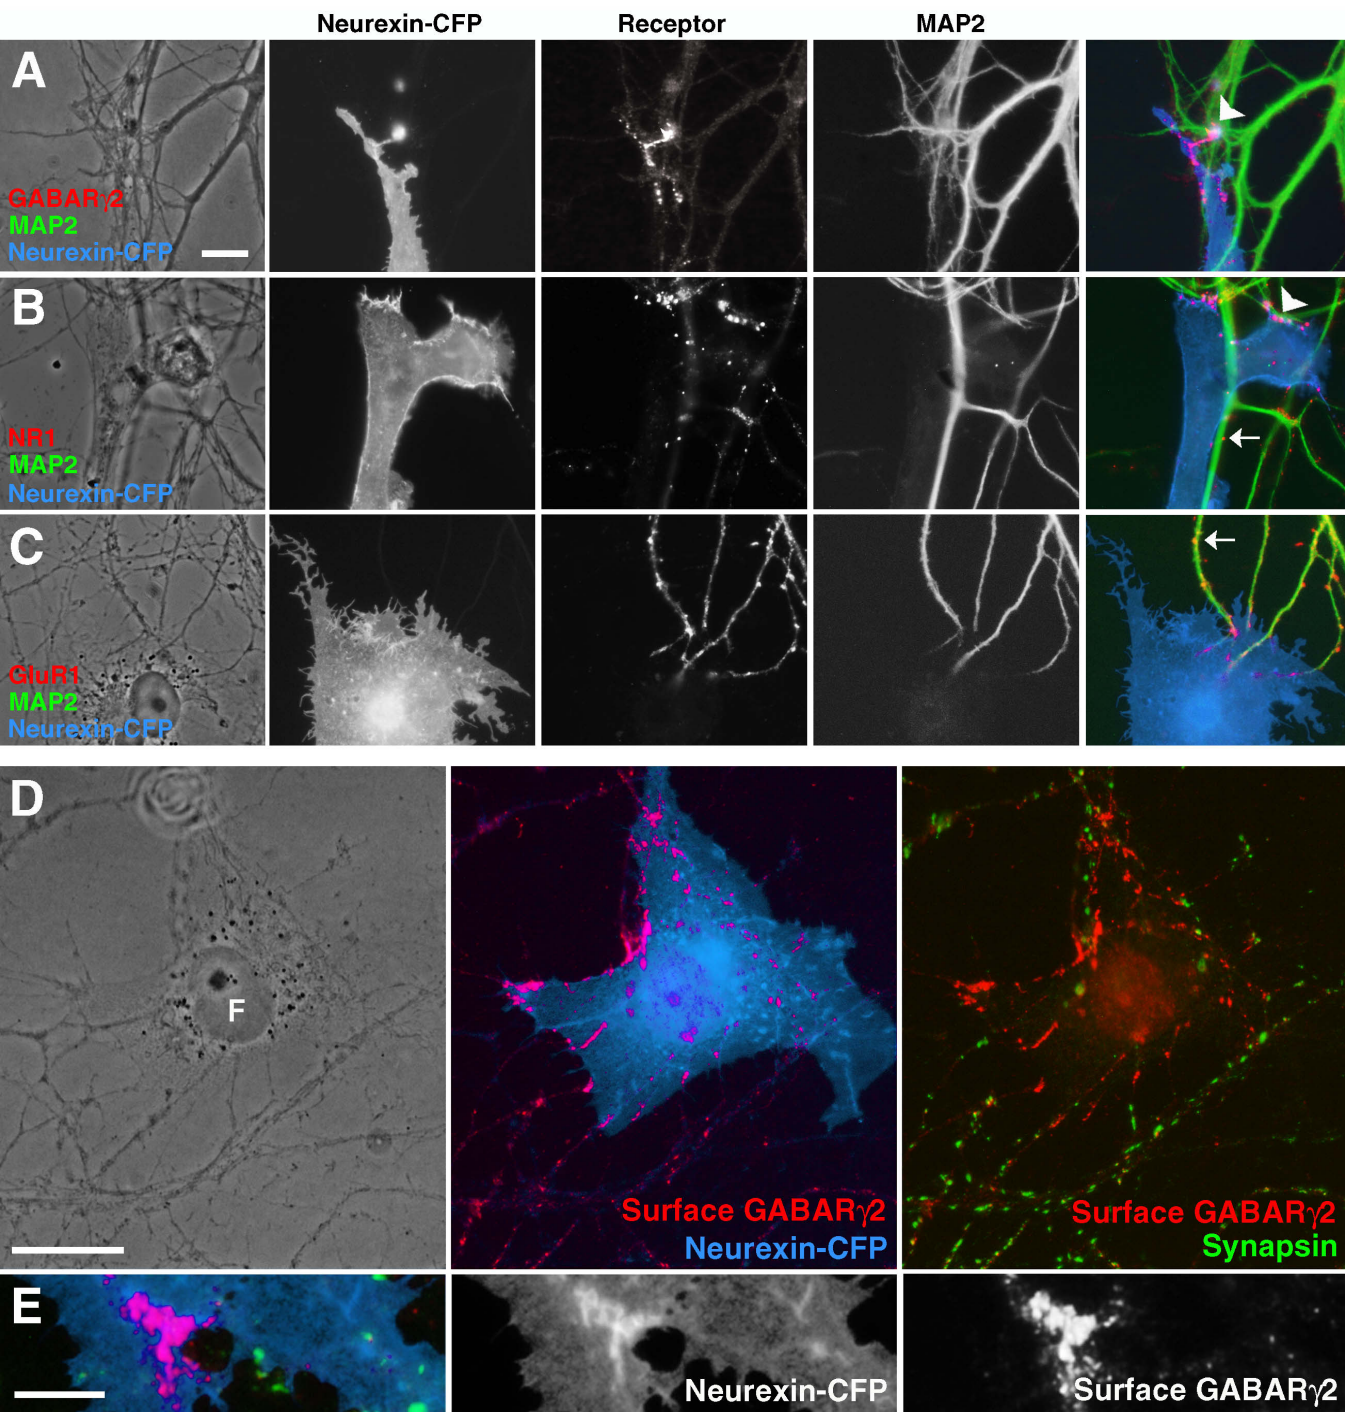

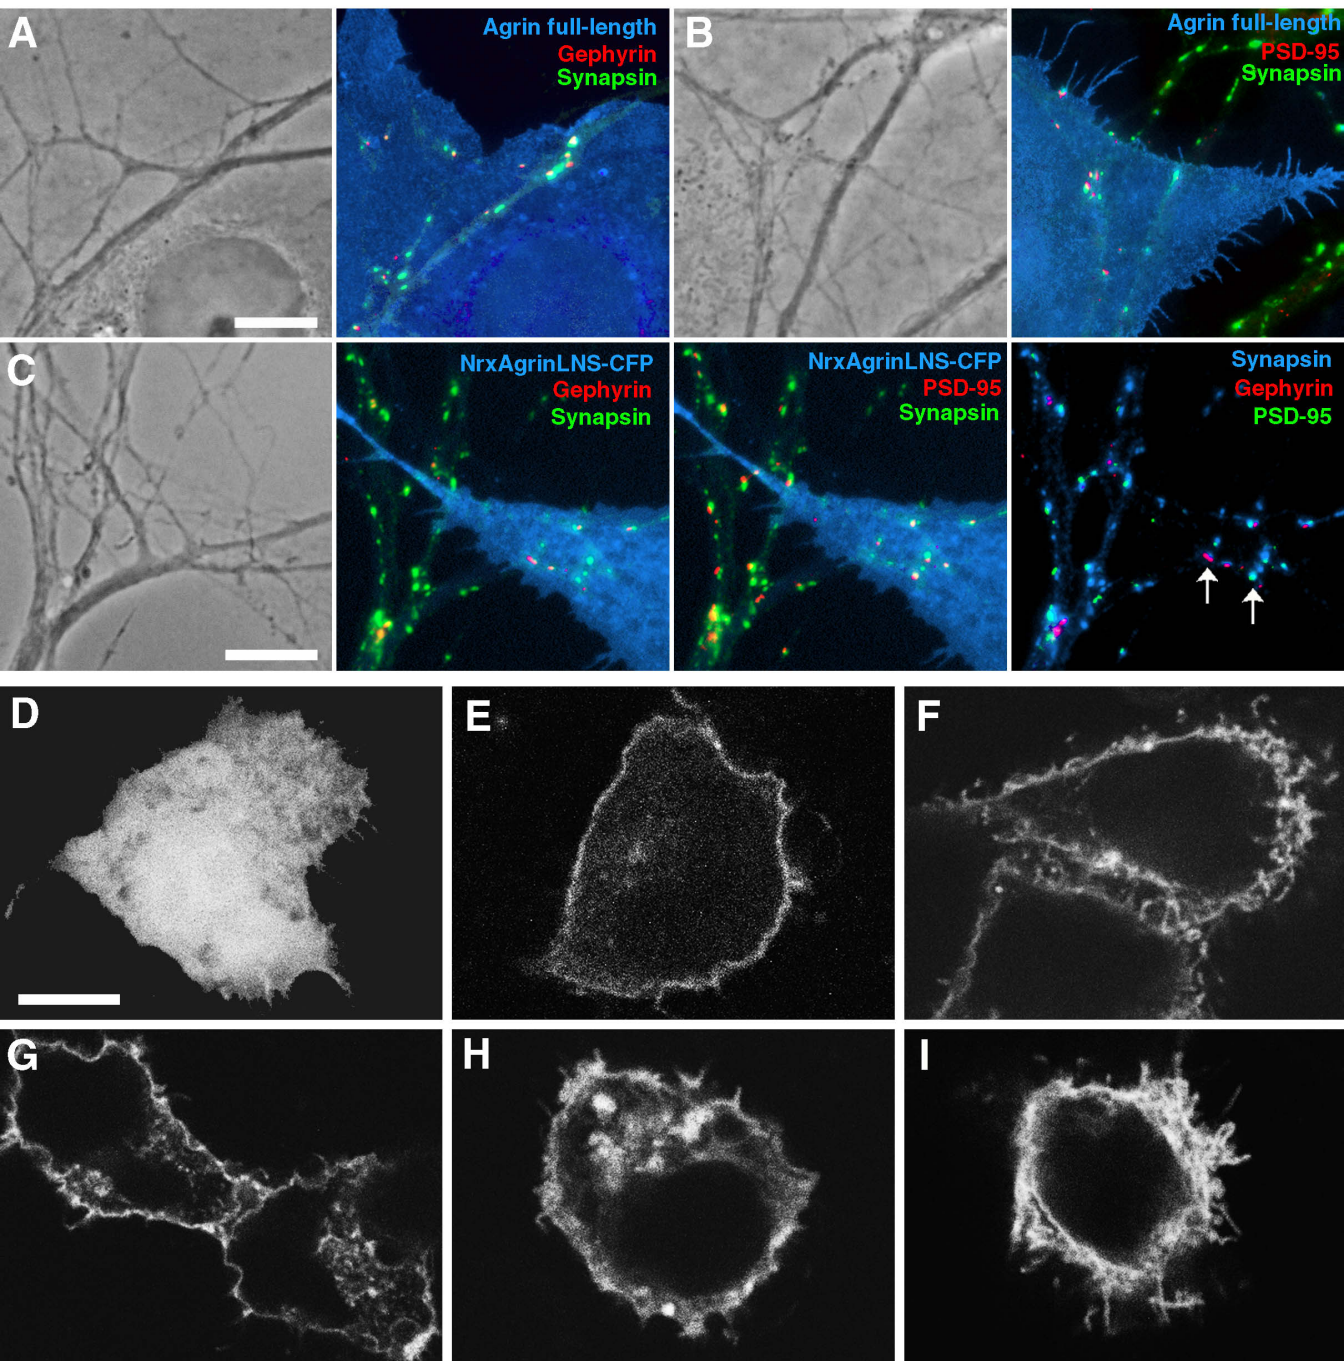

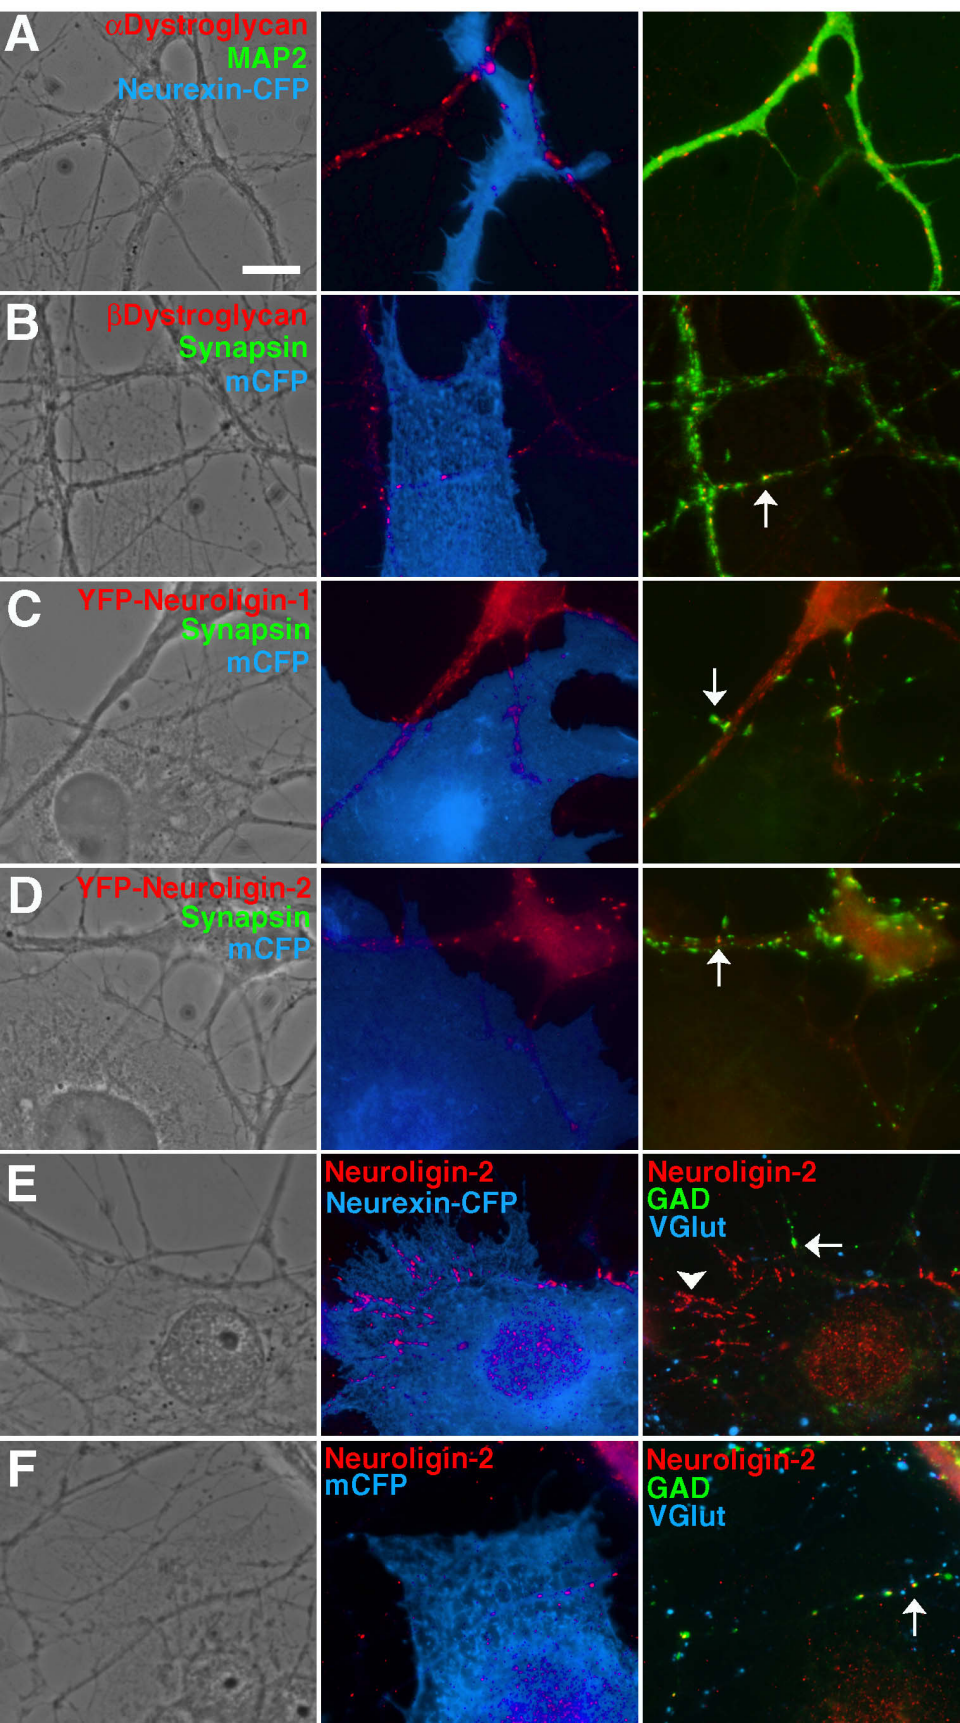

Supplement: NIHMS174487-supplement-1.pdf [file NIHMS174487-supplement-1.pdf]
